# Supplementary material for: Co-crystals and co-crystal hydrates of vanillic acid
Source: Royal Society of Chemistry journal article supplement (doi:10.1039/c4ce01795a), 2014-11-18
Supplement: c4ce01795a1.pdf [file c4ce01795a1.pdf]

Supplementary information

DSC plots:

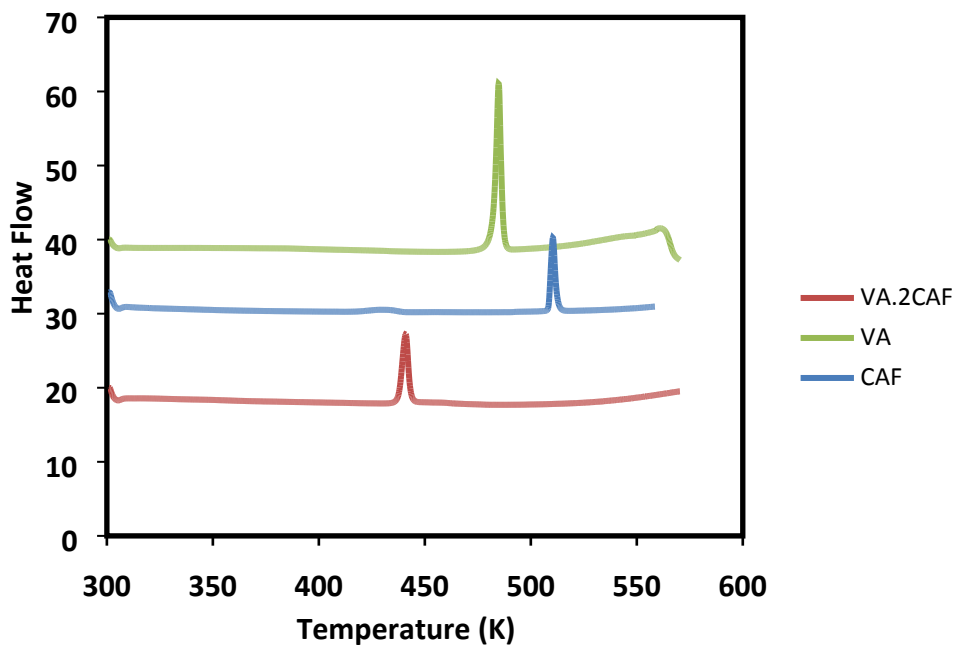

Figure 1 DSC plots for VA•2CAF (red), VA (green) and CAF (blue).

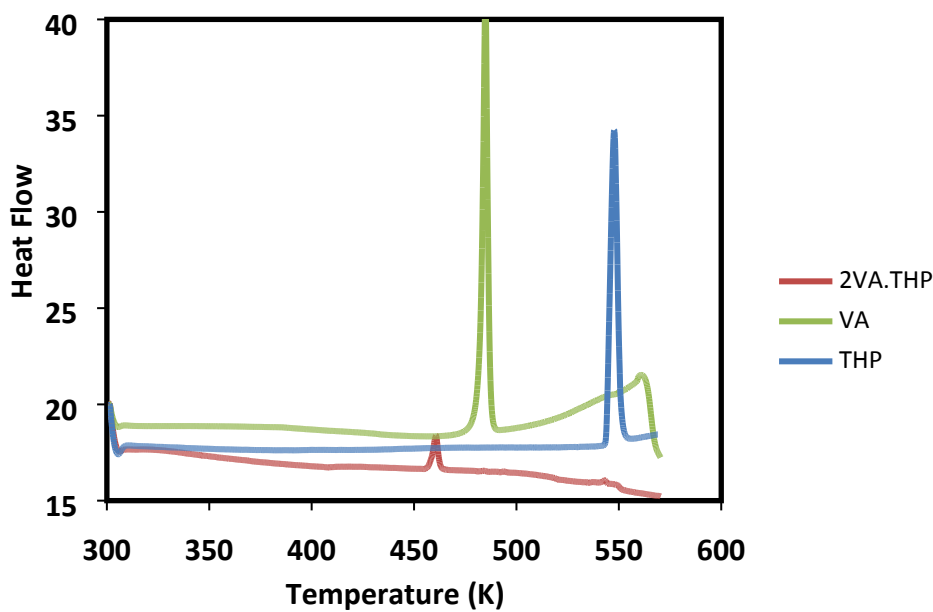

Figure 2 DSC plots for 2VA•THP (red), VA (green) and THP (blue).

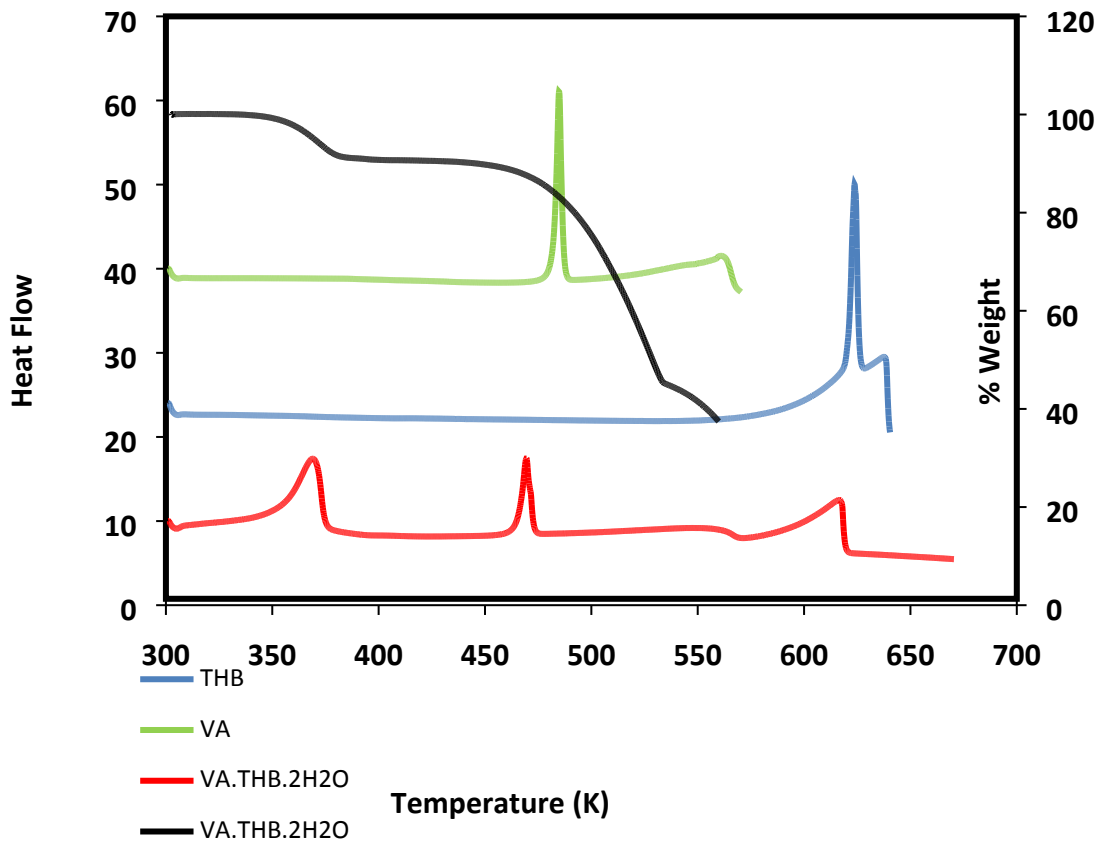

Figure 3 DSC plots for VA•THB•2H<sub>2</sub>O (red), VA (green) and THB (blue). TG plot for VA•THB•2H<sub>2</sub>O (black).

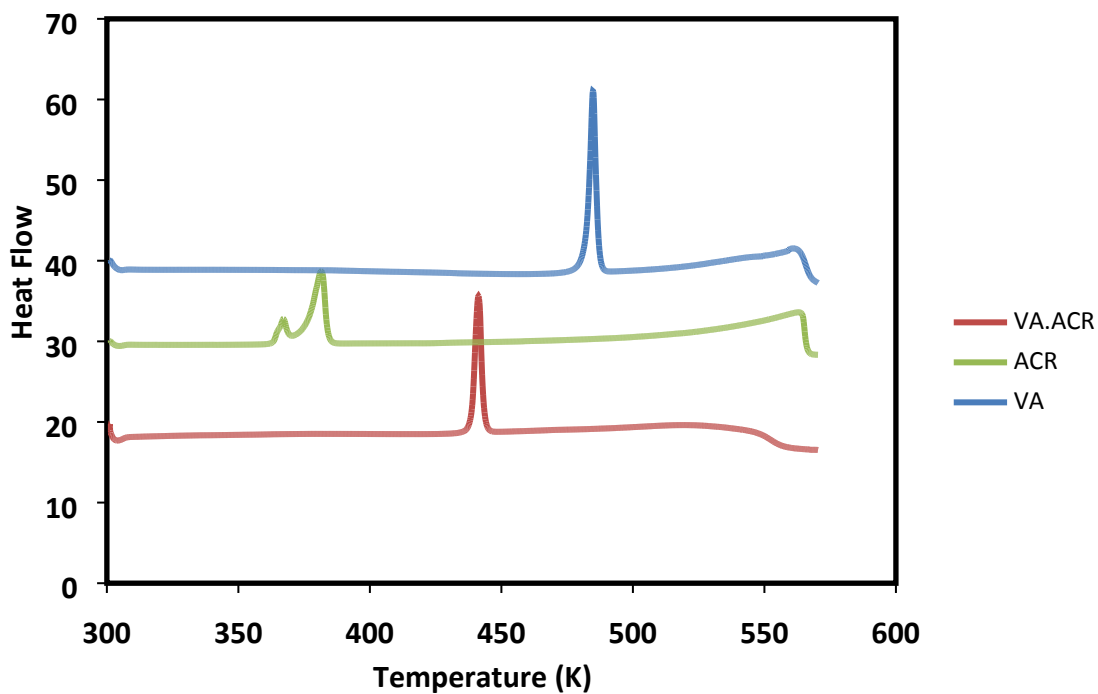

Figure 4 DSC plots for VA•ACR (red), VA (blue) and ACR (green).

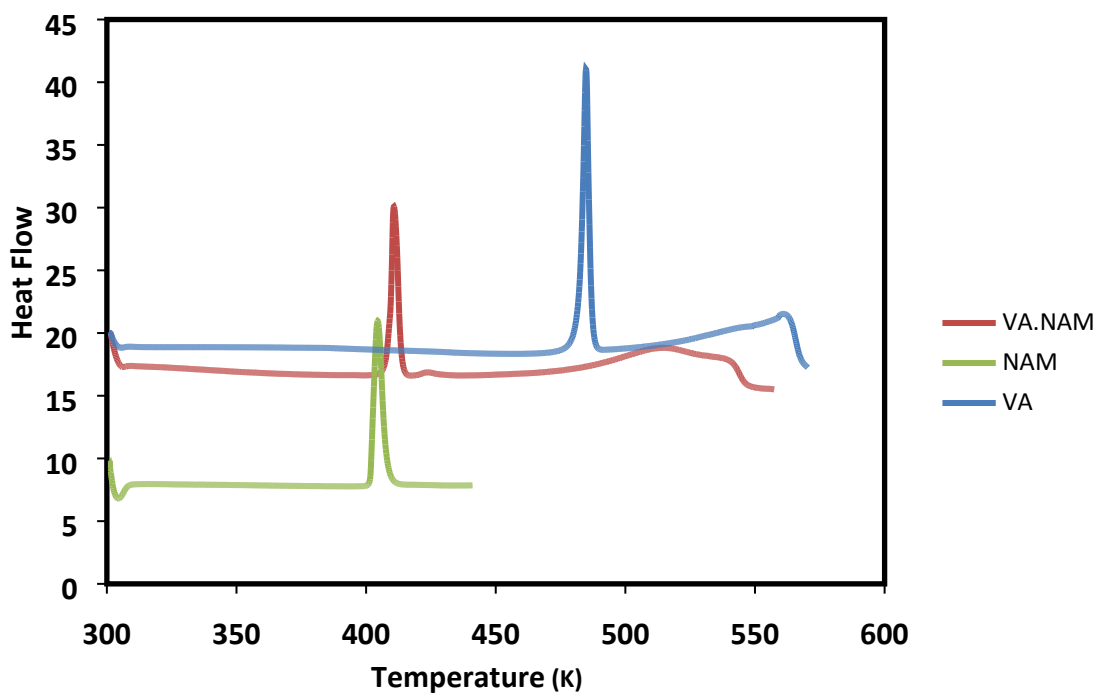

Figure 5 DSC plots for VA•NAM (red), VA (blue) and NAM (green).

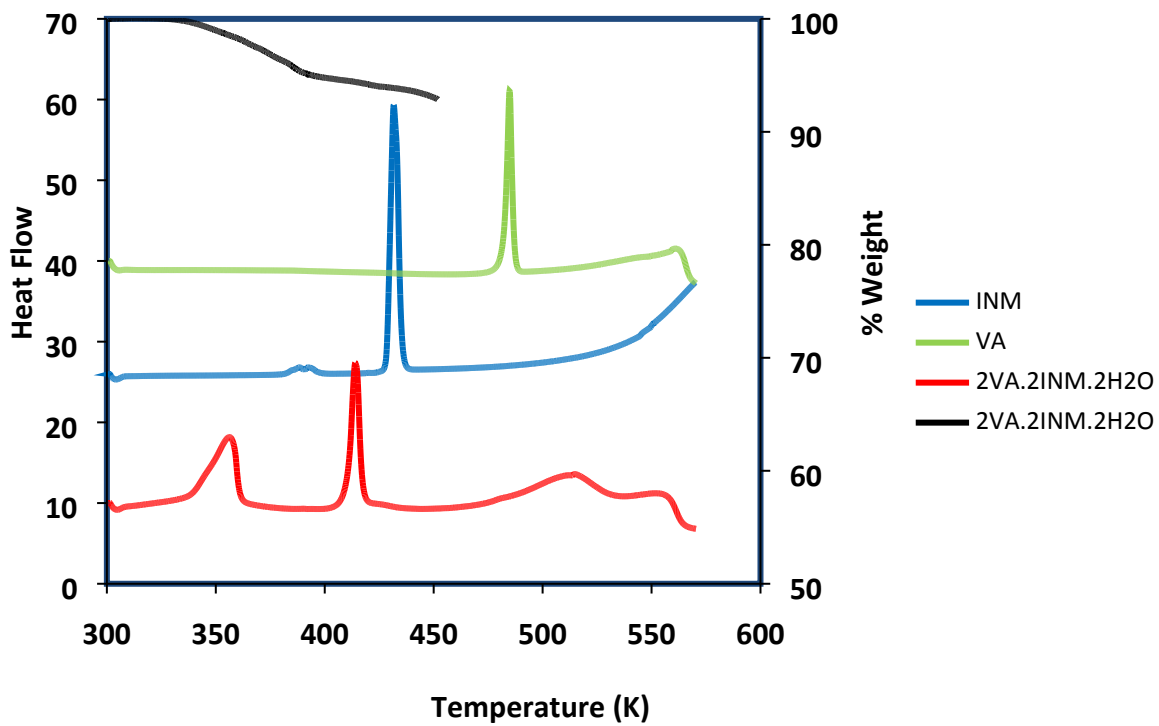

Figure 6 DSC plots for 2VA•2INM•2H<sub>2</sub>O (red), VA (green) and INM (blue). TG plot of 2VA•2INM•2H<sub>2</sub>O (black)

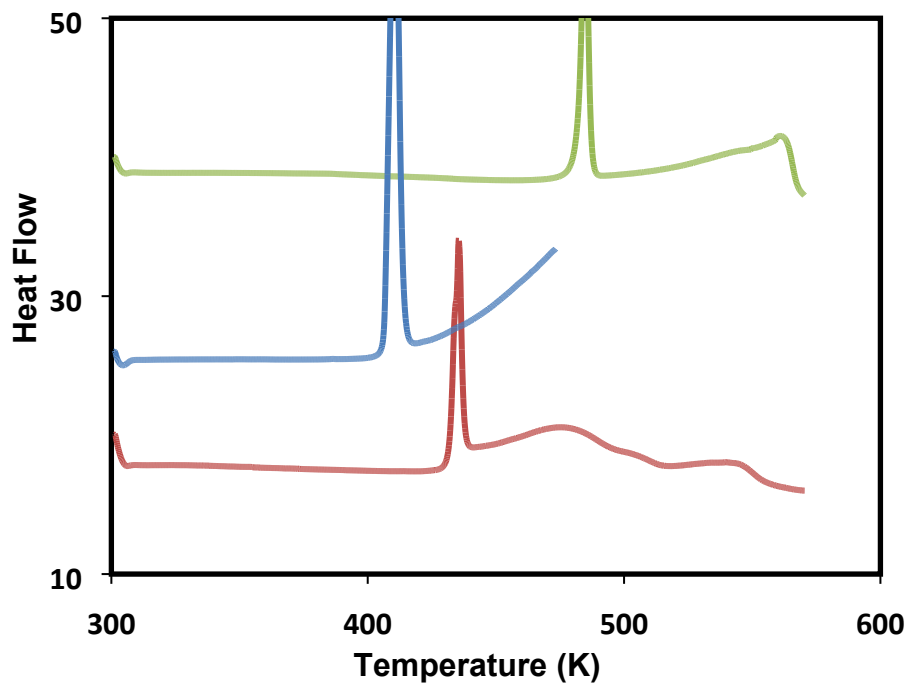

Figure 7 DSC plots for 2VA•2U (red), VA (green) and U (blue).

PXRD results of grinding, slurry and liquid assisted grinding experiments.

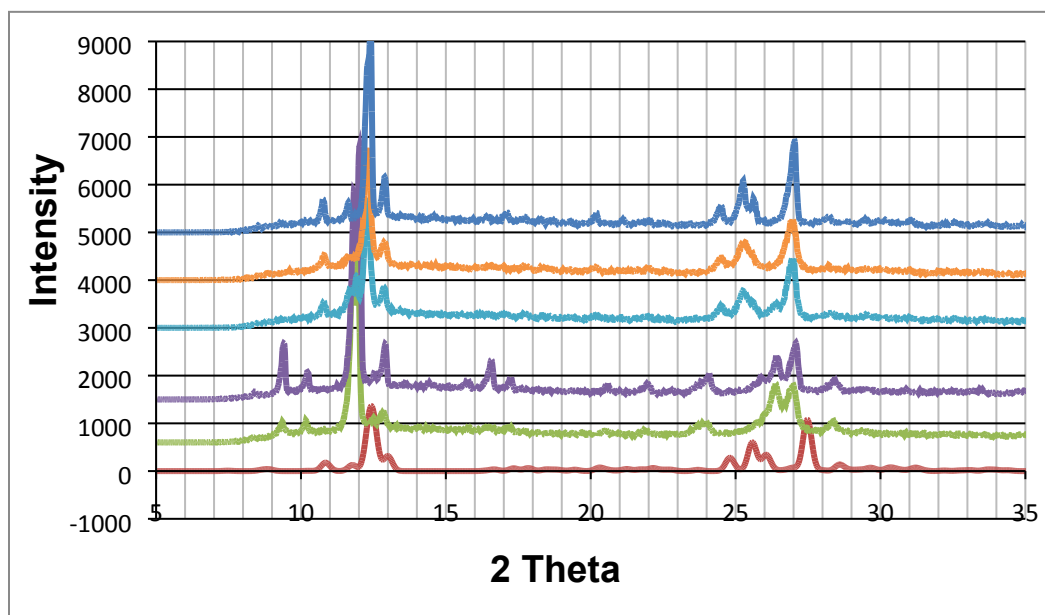

**Figure 8** PXRD patterns of **VA•2CAF** calculated (red), ground product after 30 min (green), physical mixture (purple), ground product after 45 min (sky blue), ground product after 1 hr (orange) and slurry (blue).

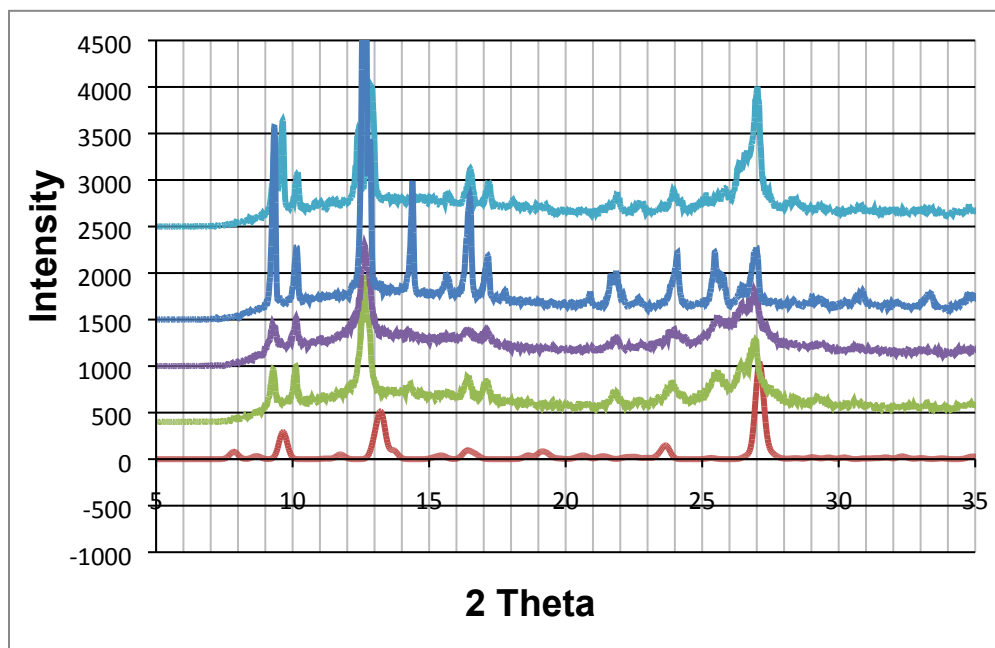

**Figure 9** PXRD patterns of **2VA•THPH** calculated (red), ground product after 20 min (green), ground product after 30 min (purple), slurry (sky blue) and physical mixture (blue).

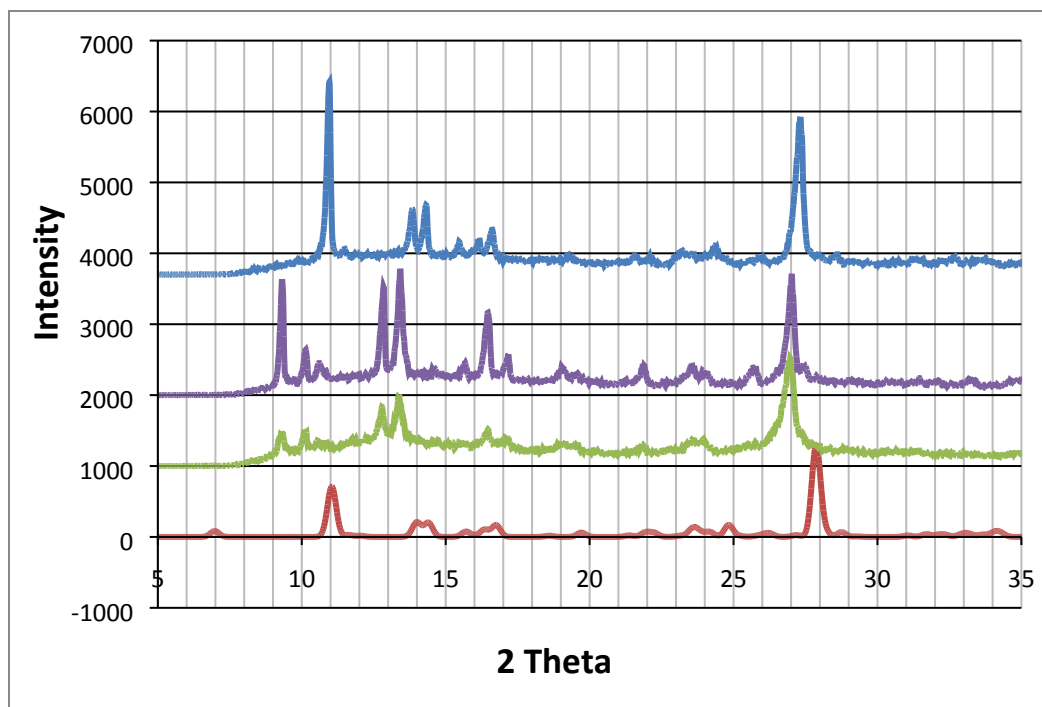

**Figure 10** PXRD patterns of **VA•THBR•2H<sub>2</sub>O** calculated (red), ground product (green), physical mixture (purple) and liquid assisted ground product (blue)-Note the peak at 2θ=7° is small compared to peak at 2θ=11°

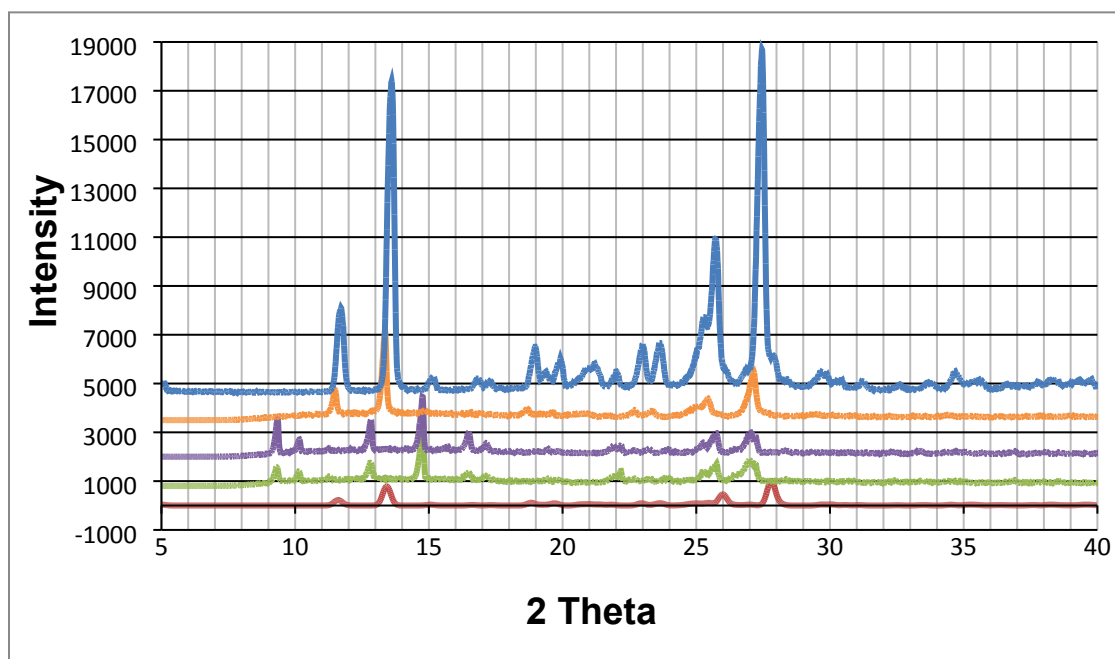

**Figure 11** PXRD patterns of **VA•NAM** calculated (red), ground product (green), physical mixture (purple) and slurry (orange) and liquid assisted grinding (blue).

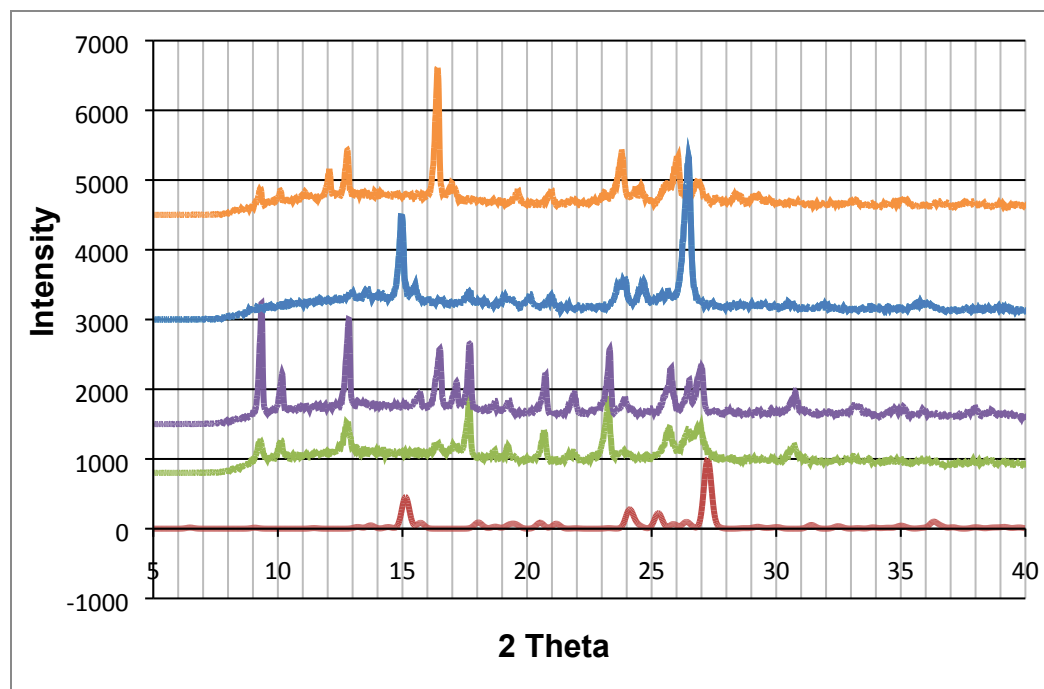

**Figure 12** PXR D patterns of  $2VA \cdot 2INM \cdot 2H_2O$  calculated (red), ground product (green), physical mixture (purple), slurry in methanol (orange) and liquid assisted ground product (blue).

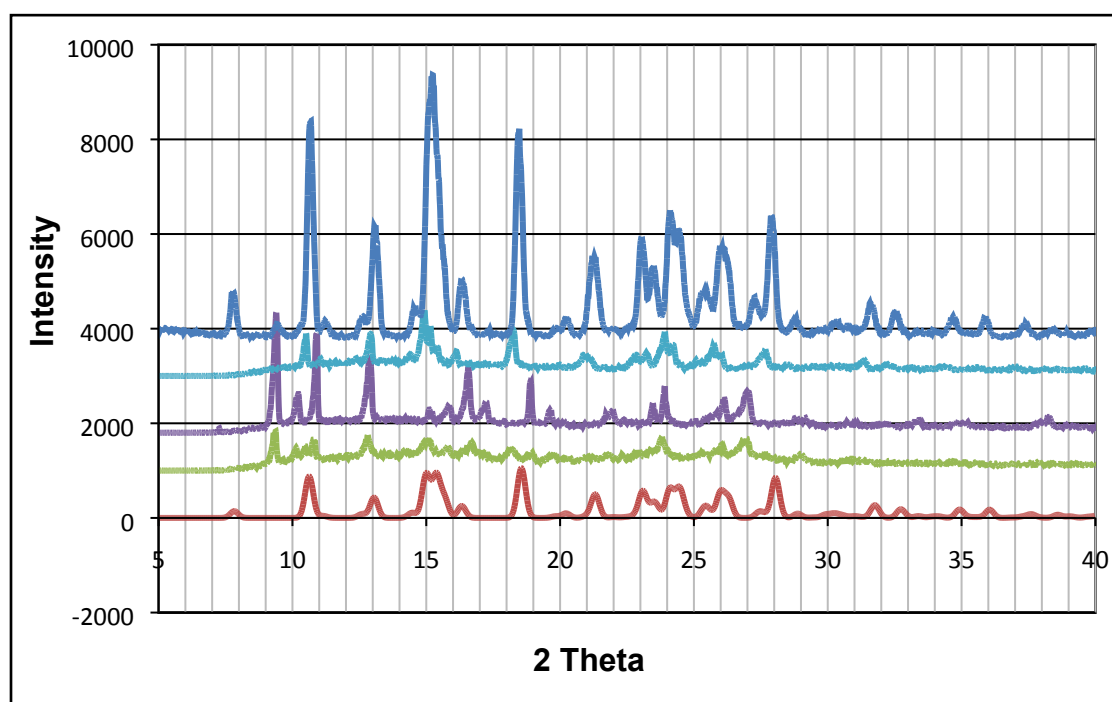

**Figure 13** PXR D patterns of  $VA \cdot ACRI$  calculated (red), ground product (green), physical mixture (purple), slurry (sky blue) and liquid assisted ground product (blue).

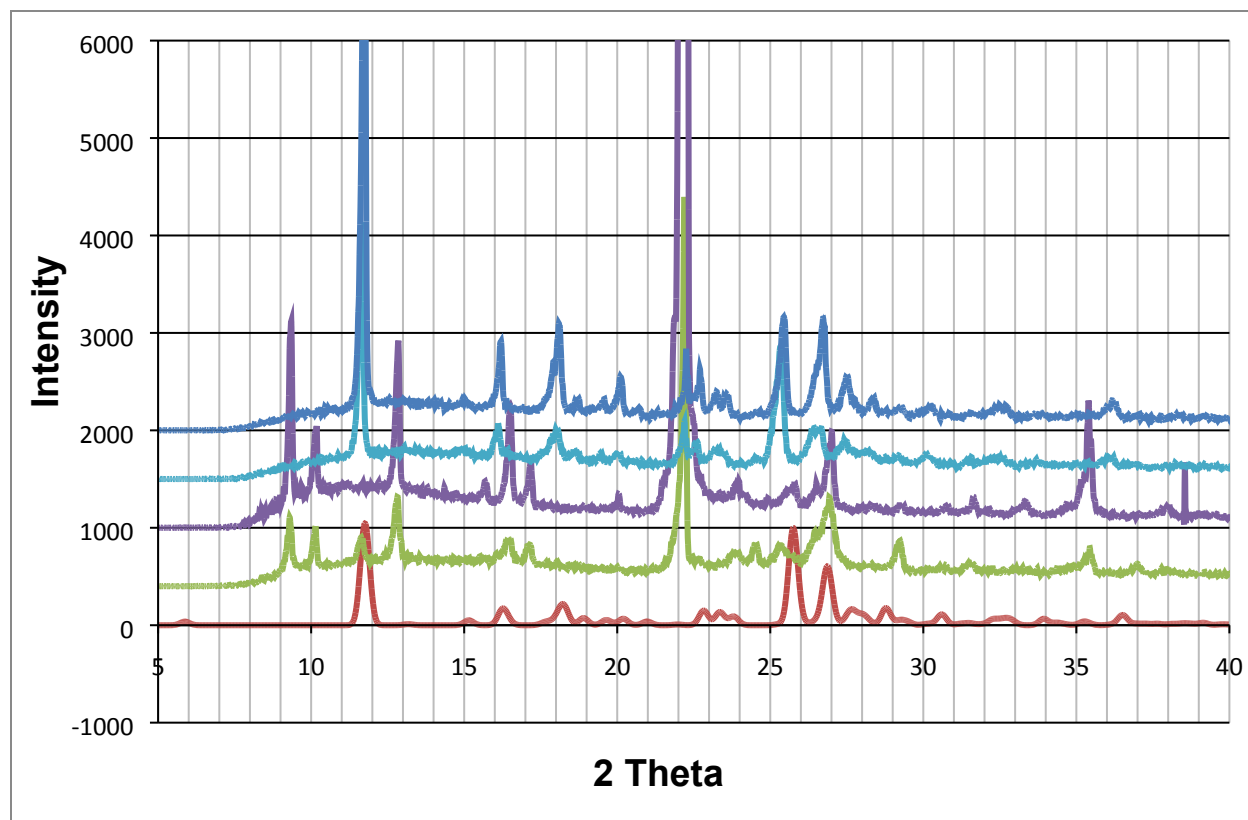

**Figure 14** PXRD patterns of **2VA•2U** calculated (red), ground product (green), physical mixture (purple), liquid assisted ground product (sky blue) and slurry (blue). Note the peak at  $2\theta=6^\circ$  is small compared to peak at  $2\theta=11.5^\circ$  for the liquid assisted product.
